# Supplementary material for: Planning Ecotourism in Coastal Protected Areas; Projecting Temporal Management Scenarios
Source: MDPI journal article supplement (doi:10.3390/su13147528), 2021-07-06
Supplement: s1 [file s1]

Archive with 1 entries (1 files):
- sustainability-1241504-supplementary.pdf
